# Supplementary material for: Plant-derived cellulose nanocrystals as a pre-alignment layer for ferroelectric mesogens in display applications
Source: Royal Society of Chemistry journal article supplement (doi:10.1039/d5tc00259a), 2025-01-01
Supplement: d5tc00259a1.pdf [file d5tc00259a1.pdf]

## Supplementary Information

### Plant-Derived Cellulose Nanocrystals as Pre-alignment Layer for Ferroelectric Mesogens in Display Applications

T.K. Abhilash,<sup>ab</sup> Hasna M. Abdul Hakkeem,<sup>a</sup> Saju Pillai,<sup>\*ab</sup> and Achu Chandran<sup>\*ab</sup>

<sup>a</sup>Materials Science and Technology Division, CSIR-National Institute for Interdisciplinary Science and Technology (NIIST), Thiruvananthapuram - 695019, India

<sup>b</sup>Academy of Scientific and Innovative Research (AcSIR), Ghaziabad - 201002, India

\* Corresponding authors.

E-mail: [pillai\\_saju@niist.res.in](mailto:pillai_saju@niist.res.in) (S. Pillai), [achuchandran@niist.res.in](mailto:achuchandran@niist.res.in) (A. Chandran).

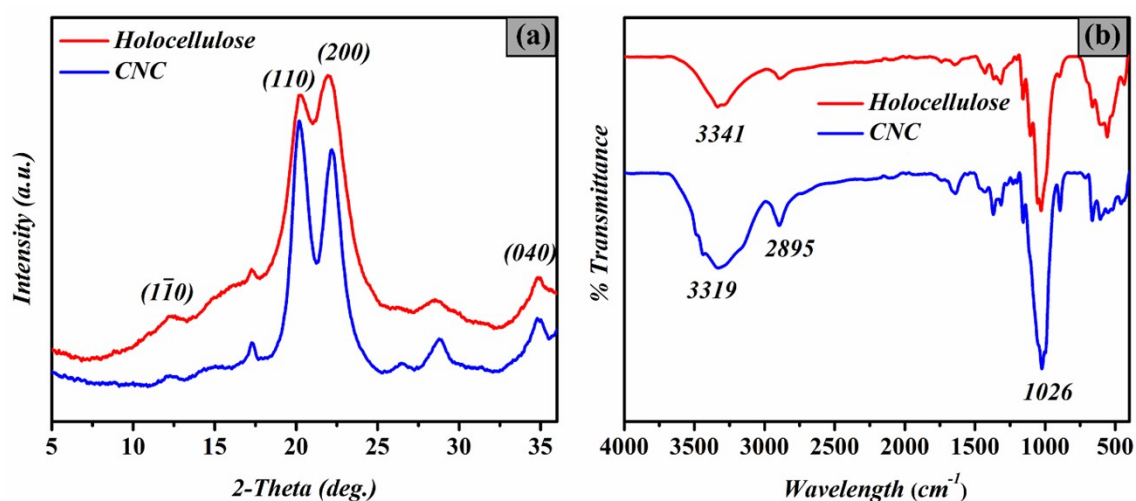

Figure S1. (a) WAXS pattern and (b) FTIR spectra of CNC.

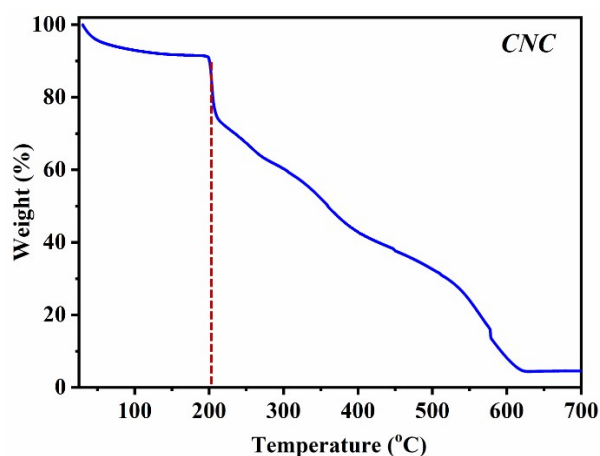

Figure S2. Thermogravimetric analysis of CNC films.

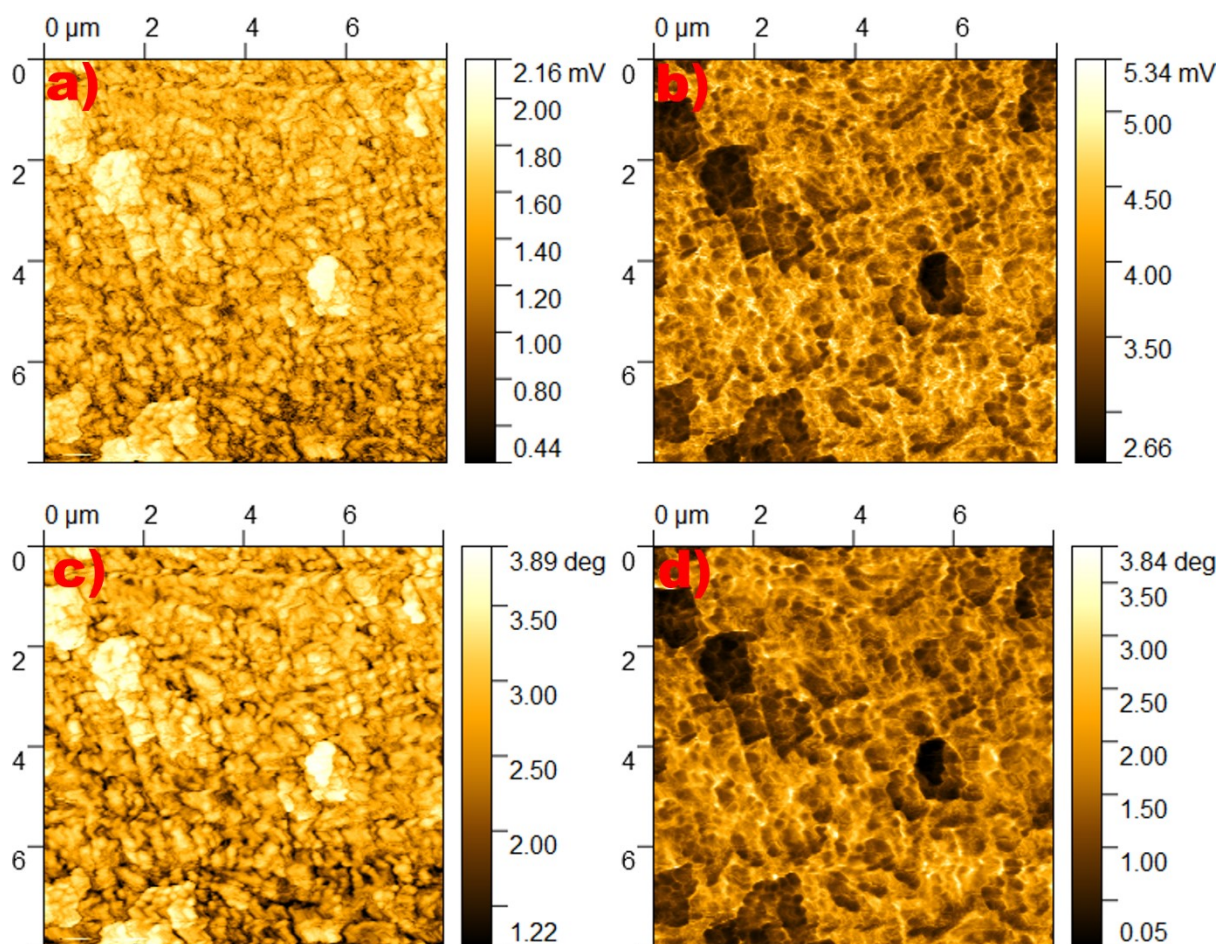

**Figure S3.** PFM images of CNC film; a) amplitude with -3V, b) amplitude with +3V, c) phase with -3V, d) phase with +3V.

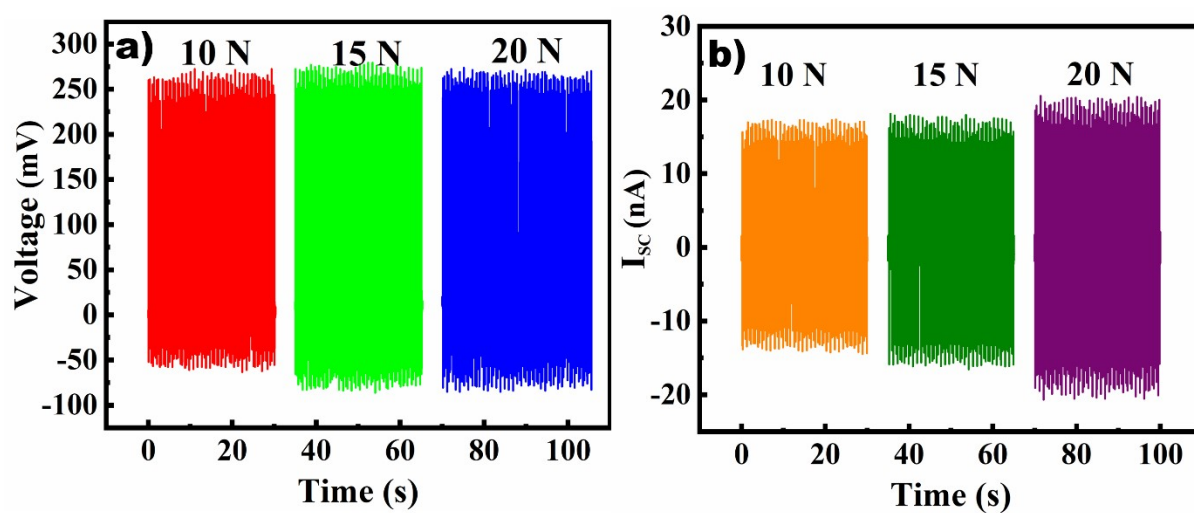

**Figure S4.** Output characteristics of PENG with different applied forces at 4 Hz; a) Open circuit voltage, and b) short circuit current.

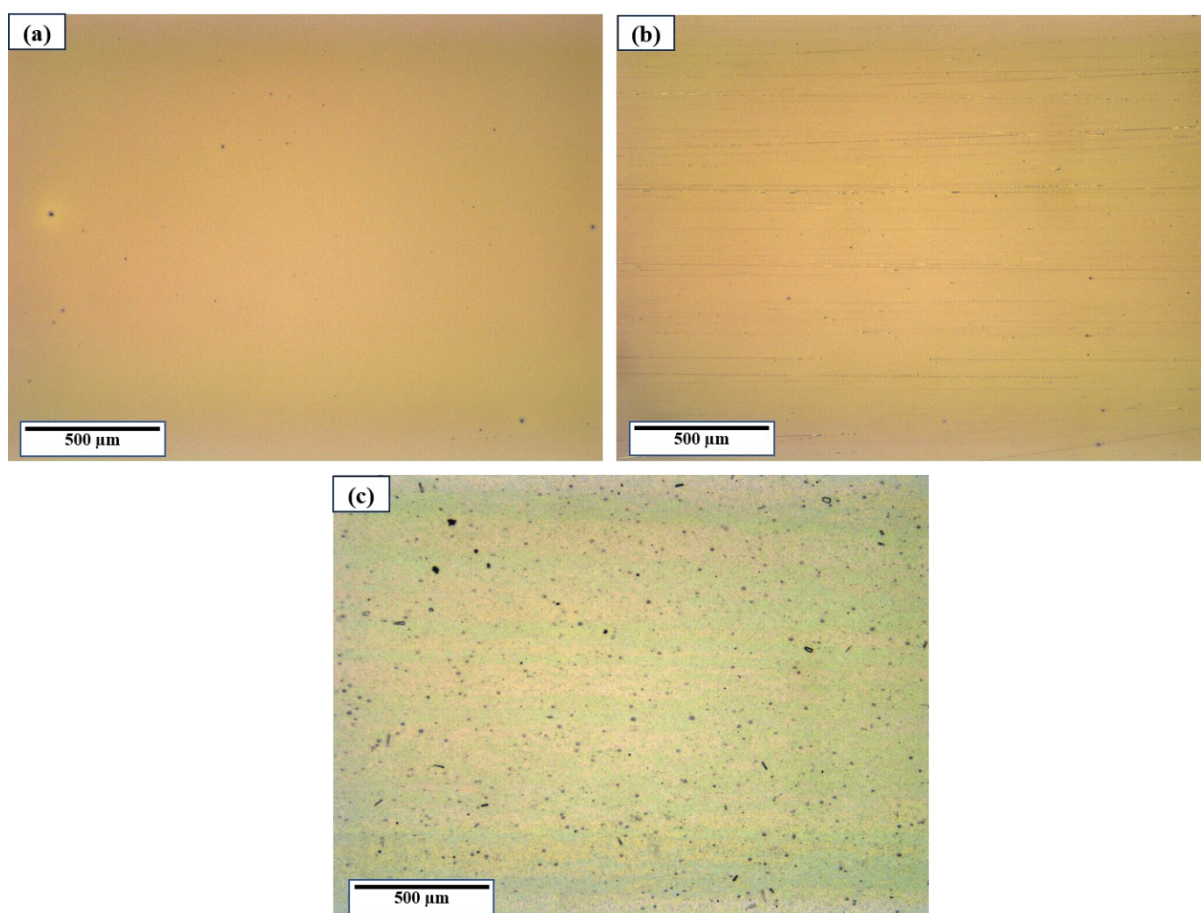

**Figure S5.** The optical micrographs of alignment layers through polarizing optical microscope in reflection mode without polarizers; (a) Nylon layer without rubbing (b) Nylon layer with rubbing (c) CNC alignment layer.

| Sample             | Thickness of alignment layer ( $\mu\text{m}$ ) |
|--------------------|------------------------------------------------|
| CNC <sub>100</sub> | 0.9                                            |
| CNC <sub>150</sub> | 1.185                                          |
| CNC <sub>200</sub> | 1.515                                          |
| CNC <sub>250</sub> | 1.803                                          |
| CNC <sub>300</sub> | 2.125                                          |

**Table S1.** Thickness of CNC coatings on ITO substrates.

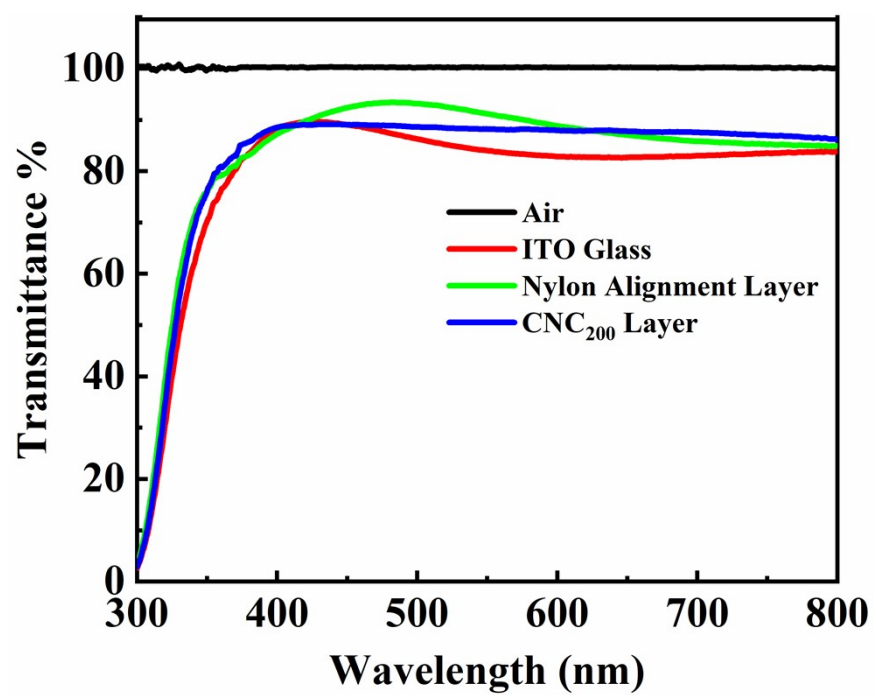

**Figure S6.** Optical transmittance of different alignment layers before LC cell fabrication.
